# Supplementary material for: Efficient Collocation of GNSS Radio Occultation Soundings with Passive Nadir Microwave Soundings
Source: Copernicus journal article supplement (doi:10.5194/egusphere-2022-1266), 2022-11-28
Supplement: Supplementary file [file egusphere-2022-1266-AC1-supplement.pdf]

Thank you so much for reviewing our paper! We've copied your review here in blue. We've responded to each part of your review separately, in black. We've also printed our planned revisions in response to your comments here, in black italics.

#### Review 1:

Combining radio occultation (RO) and passive microwave radiometer (MWR) is beneficial in many aspects. High vertical (RO - limb sounding) and horizontal (MWR – nadir sounding) resolution, RO bias correction, and MWR data calibration all make this combination appealing. However, searching for the collocation between RO and MWR is a time-consuming and computationally expensive task due to large number of MWR footprints and the random nature of the RO sounding locations. In this manuscript, authors developed a new algorithm called “rotation-collocation” method which significantly reduce the computation resources and time required for collocation identification. Based on its importance toward future mission and data analysis, I recommend this article to be published after minor revision.

One thing I would like to point out is that the comparison throughout the article with the traditional brute-force method is not entirely fair. The brute-force method gives us the pairs of footprints and RO location that satisfy the criteria, and the exact time and distance difference between the pairs. This information may either be missing after the coordinate transformation or needs further processing (which comes with extra computing complexity) using the new method. In addition to the accuracy and computing performance, I suggest to compare the final products between the two approaches as well.

This is a good point. However, the brute-force implementation used for this paper doesn't actually give us MW footprints that satisfy the criteria. Instead of checking all MW footprints satisfying the temporal match criterion, our implementation terminates early as soon as a collocation is found, which yields significant time savings when a high percentage of RO soundings are collocated and when the temporal criterion is lax (e.g. the  $\Delta t = 3$  hours case presented in section 4.6).

Furthermore, we have updated the rotation-collocation method to return predicted MW footprint time and scan angle for all collocated RO soundings (note that it still does not extract real collocated MW footprints). This change is relatively minor, as the rotation-collocation method was already internally calculating predicted MW footprint time, and so it has not had much effect on the computational resource consumption of the rotation-collocation method.

Extracting MW footprints from both methods is outside the scope of this paper, but we expect that full MW footprint extraction will not significantly alter the performance gap between the two methods. We do expect that MW footprint extraction will slightly slow down both methods.

We will explicitly state upfront in the introduction that we are not extracting MW footprints from any method in this paper, and we will also elaborate on our plans to extract MW footprints in the future in section 5.1.

Original lines 52-53: “The algorithm for collocation involving rotation into the reference frame of the nadir scan pattern we refer to as the rotation-collocation method.”

Revised lines 54-61: “The algorithm for collocation involving rotation into the reference frame of the nadir scan pattern we refer to as the rotation-collocation method.

The rotation-collocation method implemented in this paper identifies RO soundings which cross the nadir scanner's scan line and predicts the approximate time and location of the closest nadir-scanner footprint to these RO soundings, but does not extract the nadir-scanner footprints collocated with these RO soundings. In order to fairly compare the rotation-collocation method to brute force methods, the brute force methods implemented in this paper also do not extract the nadir-scanner footprints associated with collocated RO soundings, and instead leverage early termination once a collocation is found for faster collocation-finding.”

Original lines 436-441: “At present, the rotation-collocation algorithm identifies RO soundings which are collocated with nadir-scanner soundings, but does not identify the specific nadir-scanner soundings associated with each collocation. In the future, the authors plan to extend the rotation-collocation algorithm to identify the specific nadir-scanner soundings associated with each collocated RO sounding, and to integrate this extended version of the rotation-collocation algorithm into NASA's existing earth science data management software in order to speed up collocation-finding and assimilation of RO data into numerical weather prediction models.”

Revised lines 480-492: “At present, the rotation-collocation algorithm identifies RO soundings which are collocated with nadir-scanner soundings, and additionally identifies the expected time and scan angle of the presumably-collocated nadir-scanner sounding. However, the rotation-collocation algorithm does not verify the existence of a nadir-scanner sounding at the expected time and scan angle, and so does not extract the specific nadir-scanner soundings associated with each collocation. The brute-force algorithms implemented in this paper also do not identify the specific nadir-scanner soundings associated with each collocation. In the future, the authors plan to extend the rotation-collocation algorithm to identify the specific nadir-scanner soundings associated with each collocated RO sounding, and to integrate this extended version of the rotation-collocation algorithm into NASA's existing earth science data management software in order to speed up collocation-finding and assimilation of RO data into numerical weather prediction models.

The authors anticipate that extracting specific nadir-scanner soundings associated with each collocation will slow down both the rotation-collocation and brute-force methods, but will narrow the performance gap between the rotation-collocation and brute-force methods. Nevertheless, the authors expect that the rotation-collocation method will remain much faster than equivalent brute-force methods.”

L281: Not sure if I understand this sentence correctly. What is  $\Delta u_{\max}$ ? It is the first time being mentioned in the manuscript without being defined. If it is a range of  $\Delta u$  like  $\Delta s_{\max}$ , how can a case fall beyond the range but simultaneously cross the scan line?

We will rephrase this sentence to avoid the use of  $\delta u_{\max}$ , and at the end of the paragraph, we will explain the possible causes of these false positives (see our edits to line 285).

The idea here is that false positives fall into three categories: false positives due to data unavailability (i.e. a collocation would be present if nadir-scanner data was available), false positives at the temporal boundaries for collocation (i.e. one endpoint of the apparent RO scan pattern nearly hits, but does not quite cross, the  $\delta u = 0$  line), and false positives at the spatial boundaries for collocation (i.e. the RO scan pattern crosses the  $\delta u = 0$  line, but at a scan distance slightly greater in magnitude than the maximum nadir-scanner scan distance).

In this sentence, we are referring to false positives in the second of these three categories, which may be spatially collocated with MW soundings, but narrowly miss the criteria for temporal collocation.

The two major possible causes of this are orbit propagation error and the limitations of the approximation of the MW nadir scanner as continuously scanning. In both cases, the rotation-collocation method identifies the RO sounding as crossing the  $\delta u = 0$  line, but this doesn't happen in the real world, because the rotation-collocation method simulates either the position or the footprints of the MW nadir scanner incorrectly.

Qualitatively, these RO soundings are edge cases at the temporal boundary for collocation, meaning that these soundings are not high-quality matchups, regardless of whether or not they strictly meet the criteria for collocation or are identified as collocations.

Original lines 280-282: *"Of the remaining false positives, 11 (25% of total) are soundings that fall just beyond the maximum  $\delta u_{\max}$  when compared to NOAA-20's orbit, thereby falling just outside the time window  $\Delta t$ ."*

Revised lines 296-298: *"We found that 7 (15.9% of total) are soundings that fall just outside the time window  $\Delta t$ . This occurs when one endpoint of the apparent RO scan pattern in the coordinate frame given by NOAA-20's orbit lies close to, but does not cross, the  $\delta u = 0$  line."*

L285: If under the page limit, I think it would be great if a false positive and/or false negative case can be shown using Fig. 1(b) to illustrate the statement. Also, why is the number of false positive cases always larger than the one of false negative?

Yes, adding a figure to demonstrate what false positives look like is a great idea. We added a figure in the style of Fig 1(a) & Fig 1(b) showing a real false positive: a COSMIC-2 RO sounding which narrowly falls outside of the spatial boundaries for collocation.

We also added some text explaining why there are more false positives than false negatives -- it comes down to how exactly we draw the temporal and spatial boundaries for collocation, because false positives and false negatives occur at these boundaries. We also added further clarification of the fact that false positives and false negatives are edge cases that don't generally represent high-quality match-ups. Finally, later in the paper, we explain why we prefer

windowing criteria that yield more false positives than false negatives -- false positives are easy to debunk, but false negatives present a pure loss of information.

New figure:

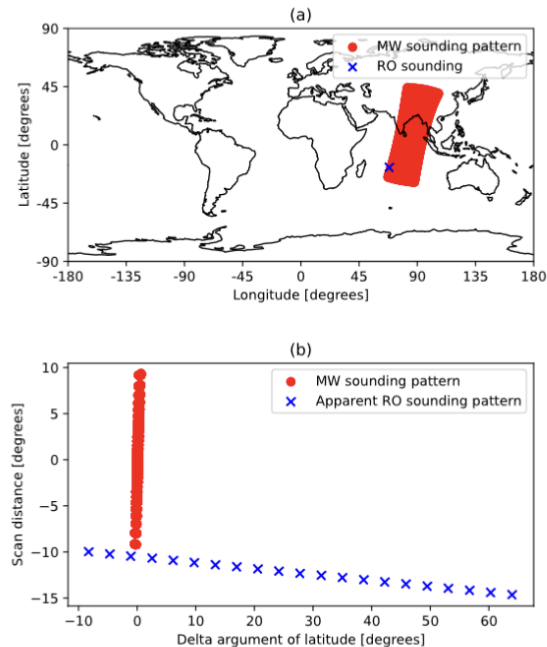

**Figure 3.** (a) A radio occultation from COSMIC-2, occurring at 7:55:12 AM GMT on January 3, 2021, falsely identified by the rotation-collocation method as a collocation, plotted against contemporaneous MW soundings from NOAA-20 ATMS. (b) The discretized apparent position of the same occultation rotated into the MW frame, plotted against the MW sounding pattern.

Original lines 283-285: “All of the false positive and false negative cases found here are associated with failures of the first assumption of the rotation-collocation algorithm, namely, that all of the nadir scanner soundings fall perfectly on an unbroken line at  $\delta u = 0$  in the rotated frame as illustrated by Figure 1(c).”

Revised lines 301-306: “All of the false positive and false negative cases found here are associated with failures of the first assumption of the rotation-collocation algorithm, namely, that all of the nadir scanner soundings fall perfectly on an unbroken line at  $\delta u = 0$  in the rotated frame as illustrated by Figure 1(c). There are more false positives than false negatives because of our windowing criteria, and adjusting these criteria would lead to more false negatives but fewer false positives. All the false positives and false negatives occur very close to the spatial or temporal boundaries for collocation, and so these misclassified soundings represent low-value collocations compared to other soundings that have more temporal and spatial overlap with the nadir-scanner sounding pattern.”

Original line 429: “Finally, the rotation-collocation method shows that...”

Revised lines 468-473: “Furthermore, most misclassified soundings are incorrect predictions (collocations predicted by the rotation-collocation algorithm but not by the brute-force method). Incorrect predictions can be easily debunked, as the rotation-collocation algorithm currently predicts the expected time and scan angle of the collocated nadir-scanner sounding for each collocation, and it is computationally trivial to check if a real nadir-scanner sounding exists at the expected time and scan angle.

Finally, the rotation-collocation method shows that...”

Fig 4 & 5: Maybe using the same format as Fig 3 and provide the confusion matrices?

Yes, we’ve replaced Figures 4 and 5 with a single figure in the same format as Figure 3, which includes the confusion matrices.

New figure:

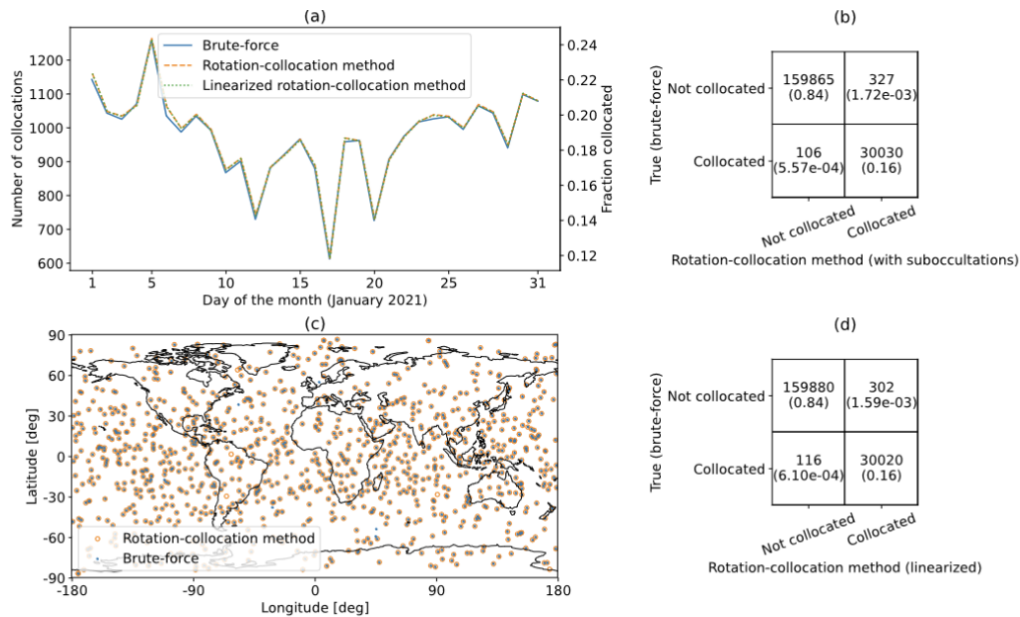

**Figure 5.** (a) Daily collocations for all satellite combinations for the month of January 2021. (b) Confusion matrix for all satellite combinations for January 2021 for the rotation-collocation method with sub-occultations. (c) Map of collocations on January 15, 2021, for all satellite combinations. (d) Confusion matrix for all satellite combinations for January 2021 for the linearized rotation-collocation method.

Table 5: The number of sub-occultations (N) is negatively related to the prediction errors as expected. Can we observe the similar trend for previous cases ( $\Delta t = 600$  s)? If so, the number of false predictions could also, at least partially, come from the nonlinearity of the RO curve instead of the  $\Delta u = 0$  straight line assumption violation.

This trend doesn’t generally hold for  $\Delta t = 600$  s, because there’s very little curvature on that timescale. For some satellite combinations (e.g. COSMIC-2/NOAA-20 as discussed in 4.1), the collocations found by the linearized rotation-collocation method and the rotation-collocation method with sub-occultations are identical. For others, (e.g. Metop-B/Metop-B as discussed in

4.2), different collocations are found by the two methods, but the true positive and false positive rates found by both methods are approximately the same.

We will make this explicit to the reader (when discussing table 5).

Original lines 383-385: *“A sixty-minute spacing between sub-occultations is sufficient to achieve the accuracy demonstrated in sections 4.1-4.5; longer time windows between sub-occultations result in more incorrect and missed predictions and reduced accuracy, as demonstrated in Table 5.”*

Revised lines 416-422: *“A ninety-minute spacing between sub-occultations is sufficient to achieve the accuracy demonstrated in sections 4.1-4.5; longer time windows between sub-occultations result in more incorrect and missed predictions and reduced accuracy, as demonstrated in Table 5. The correlation between time between sub-occultations and accuracy breaks down as sub-occultations get close enough in time that the trajectory of the apparent RO sounding in the nadir sounder frame becomes relatively linear. This phenomenon can be seen in Table 5 – accuracy greatly improves as more sub-occultations are added, up to N = 5 sub-occultations, after which point performance remains relatively consistent.”*
